# Supplementary material for: Facile hydrothermal synthesis of a highly efficient solar active Pr6O11–ZnO photocatalyst and its multiple applications
Source: Royal Society of Chemistry journal article supplement (doi:10.1039/c4ra02733g), 2014-01-01
Supplement: c4ra02733g1.pdf [file c4ra02733g1.pdf]

## **Facile hydrothermal synthesis of a highly efficient solar active Pr<sub>6</sub>O<sub>11</sub>-ZnO**

### **Photocatalyst and its multiple applications**

Subramanian Balachandran, Kuppulingam Thirumalai and Meenakshisundaram Swaminathan\*

Department of Chemistry, Annamalai University, Annamalainagar 608 002, India.

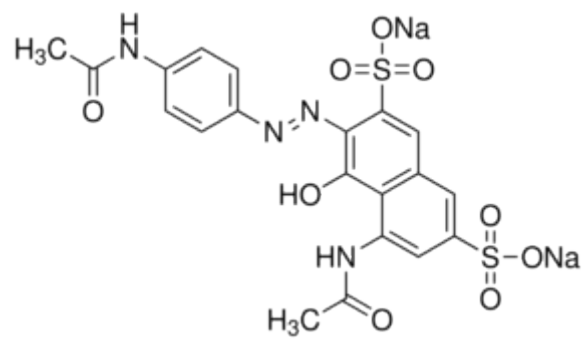

**Acid Violet 7(C<sub>20</sub>H<sub>16</sub>N<sub>4</sub>Na<sub>2</sub>O<sub>9</sub>S<sub>2</sub>)**

**Fig. S1 Azo dye structure**

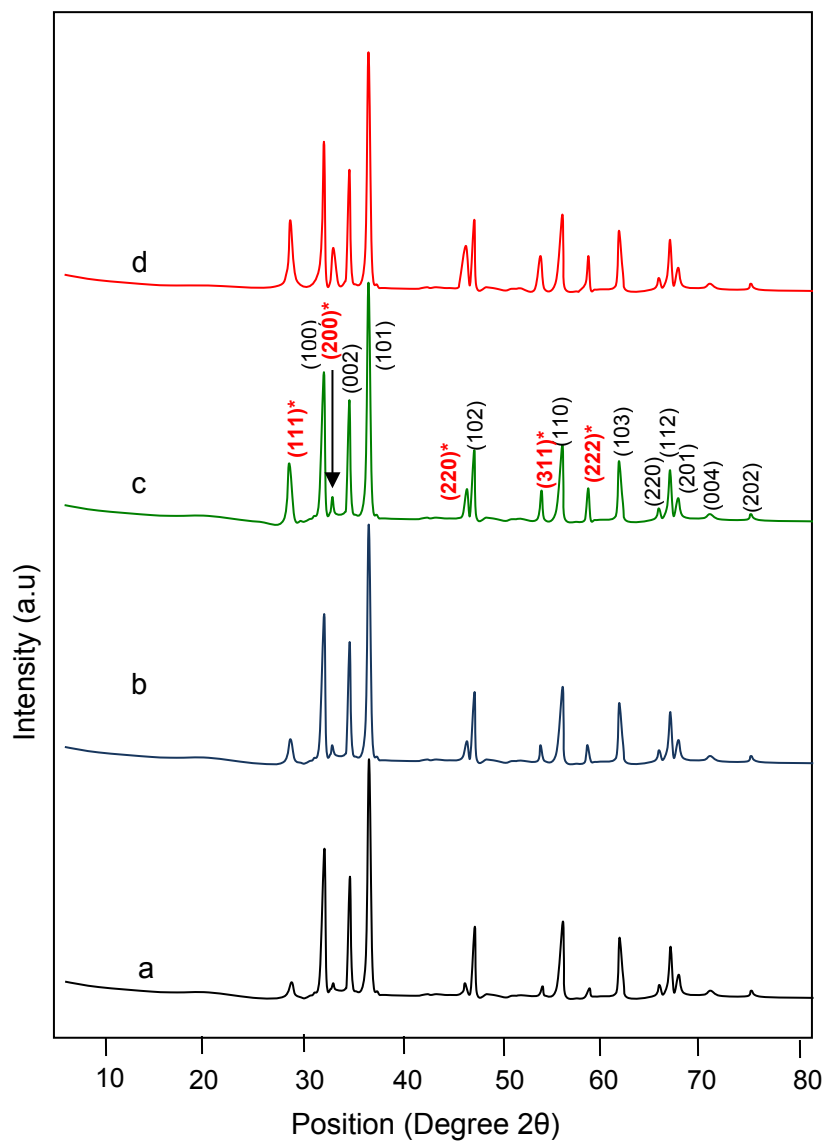

**Fig. S2** XRD pattern (a) 3wt% Pr<sub>6</sub>O<sub>11</sub>-ZnO, (b) 6wt% Pr<sub>6</sub>O<sub>11</sub>-ZnO, (c) 9wt% Pr<sub>6</sub>O<sub>11</sub>-ZnO and (d) 12wt% Pr<sub>6</sub>O<sub>11</sub>-ZnO

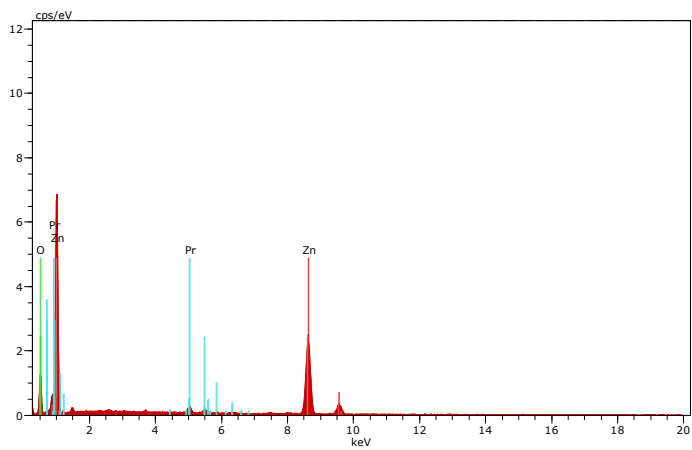

**Fig. S3** EDS spectra of Pr<sub>6</sub>O<sub>11</sub>-ZnO

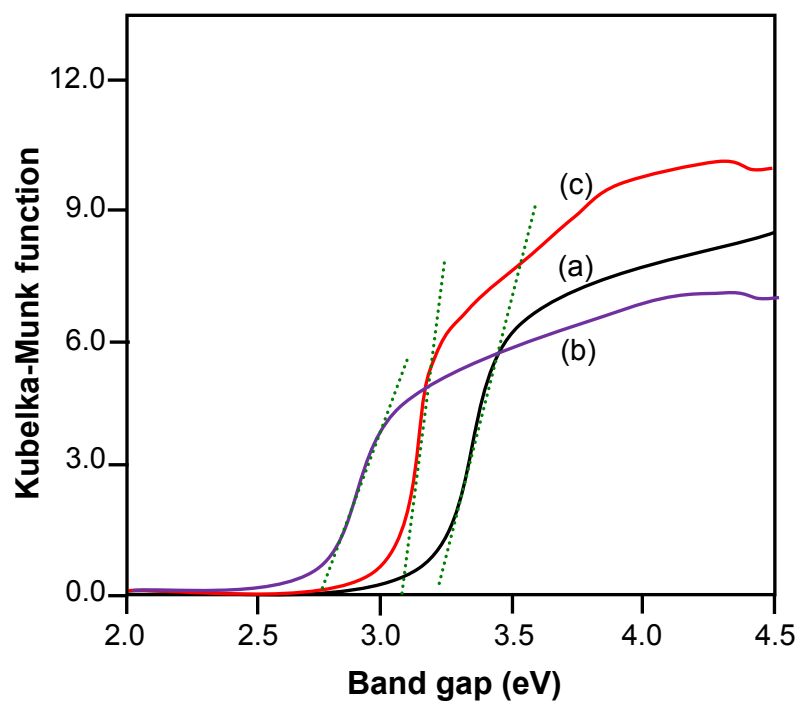

**Fig. S4** Kubelka-Munk function (a) Prepared ZnO, (b) Pr<sub>6</sub>O<sub>11</sub> and (c) Pr<sub>6</sub>O<sub>11</sub>-ZnO

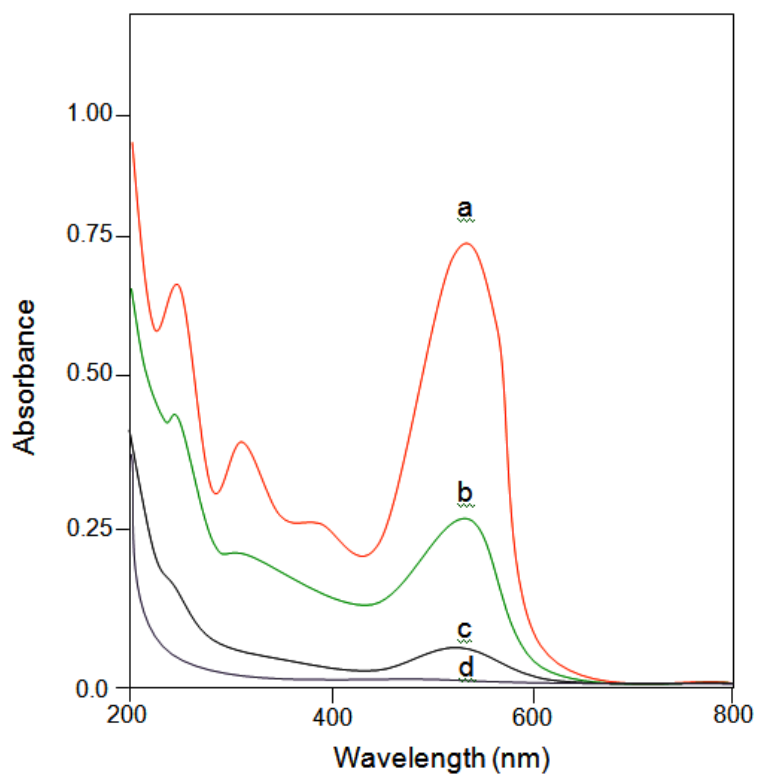

**Fig. S5** UV spectral changes of AV 7 at different irradiation times with Pr<sub>6</sub>O<sub>11</sub>-ZnO

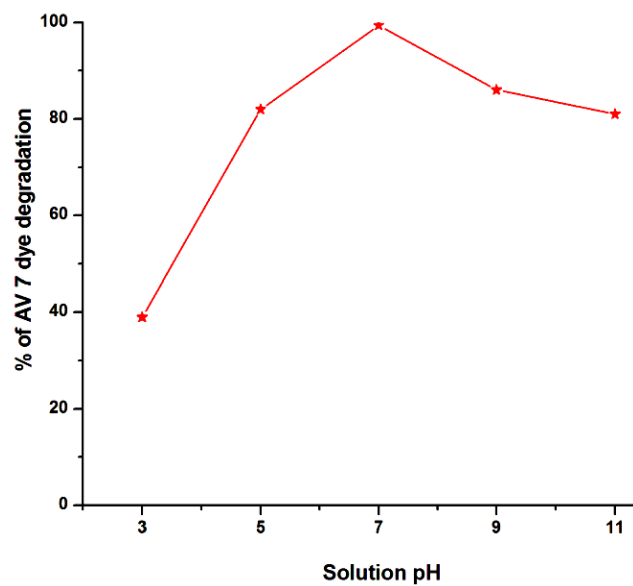

**Fig. S6** Effect of solution pH on AV 7 degradation: AV 7 dye concentration =  $5 \times 10^{-4}$  M, catalyst suspended =  $4 \text{ g L}^{-1}$ , airflow rate =  $8.1 \text{ mL s}^{-1}$ , Irradiation time = 75 min,  $I_{\text{solar}} = 1250 \times 100 \pm 100 \text{ lux}$ .

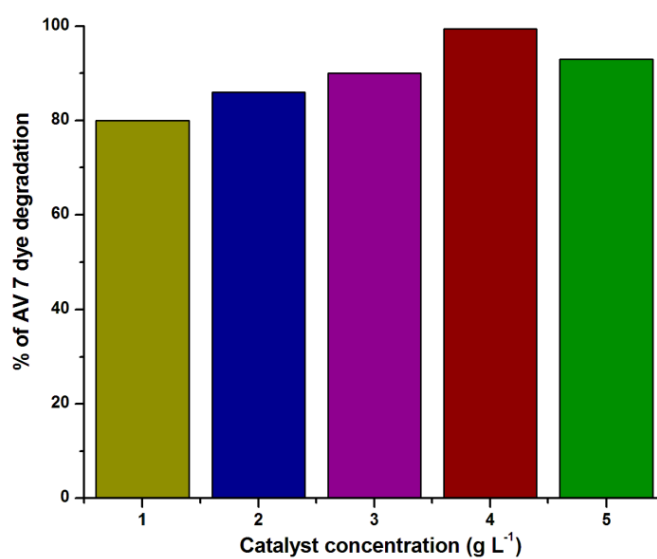

**Fig. S7** Effect of catalyst loading on AV 7 degradation: AV 7 dye concentration =  $5 \times 10^{-4}$  M, airflow rate =  $8.1 \text{ mL s}^{-1}$ , pH = 7, Irradiation time = 75 min,  $I_{\text{solar}} = 1250 \times 100 \pm 100$  lux.



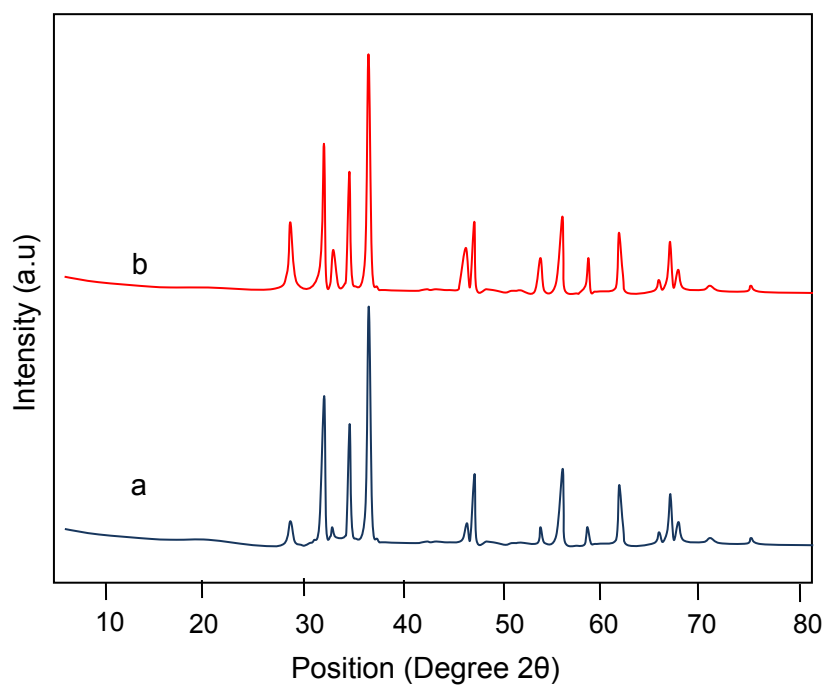

**Fig. S8** XRD pattern of (a) Fresh catalyst and (b) After 4<sup>th</sup> cycle reusable catalyst.
